# Supplementary material for: The Twazon Arabic Weight Loss App: App-Based Intervention for Saudi Women With Obesity
Source: PubMed Central journal article supplement (PMC6658271; doi:10.2196/10923), 2019-05-28
Supplement: mhealth_v7i5e10923_app1.pdf [file mhealth_v7i5e10923_app1.pdf]

## Multimedia Appendix 1

Repeated measure ANOVA analyses of 4-month weight loss intervention for the engaged users (n=26) and unengaged users (n=14)

| REPEATED MEASURES RESULTS         | Baseline Values |             | 2-Months Values |             | 4-Months Values |             | Time <sup>a</sup> | Time * group <sup>b</sup> |
|-----------------------------------|-----------------|-------------|-----------------|-------------|-----------------|-------------|-------------------|---------------------------|
|                                   | Unengaged       | Engaged     | Unengaged       | Engaged     | Unengaged       | Engaged     | p-value           | p-value                   |
| Body Weight, Kg                   | 80.6 ± 12.5     | 83.4 ± 15.2 | 80.5 ± 12.5     | 83.2 ± 15.3 | 80.4 ± 11.7     | 82.1 ± 15.8 | 0.183             | 0.338                     |
| WC (cm)                           | 89.1 ± 10.4     | 91.1 ± 7.7  | 87.2 ± 10       | 88.9 ± 8.6  | 86.1 ± 9.6      | 86.2 ± 8.8  | <0.001            | 0.351                     |
| BMI (kg/m <sup>2</sup> )          | 32.3 ± 3.7      | 33.5 ± 4.6  | 32.3 ± 3.8      | 33.4 ± 4.7  | 32.3 ± 3.5      | 32.9 ± 4.8  | 0.182             | 0.272                     |
| Energy intake (kcal/d)            | 1848 ± 856      | 2142 ± 818  | 1563 ± 487      | 1486 ± 549  | 1644 ± 453      | 1470 ± 535  | 0.002             | 0.295                     |
| TOTAL MDS                         | 7.46 ± 2.2      | 7.35 ± 1.7  | 8.62 ± 1.6      | 8.15 ± 2.1  | 8.0 ± 2.7       | 8.65 ± 2.2  | 0.003             | 0.388                     |
| Physical activity (METs-min/week) | 1749 ± 1765     | 1390 ± 1296 | 2379 ± 2794     | 1268 ± 1086 | 1797 ± 1617     | 1502 ± 1965 | 0.772             | 0.498                     |

<sup>a</sup> P-value tests for a significant within-group difference at all time points

<sup>b</sup> P-value tests for a significant between-group difference at all time points
