# Supplementary material for: The Twazon Arabic Weight Loss App: App-Based Intervention for Saudi Women With Obesity
Source: PubMed Central journal article supplement (PMC6658271; doi:10.2196/10923), 2019-05-28
Supplement: mhealth_v7i5e10923_app2.pdf [file mhealth_v7i5e10923_app2.pdf]

## Multimedia Appendix 2

Results of repeated measure ANOVA analysis of the MD Scores for the engaged users (n=26) and unengaged users (n=14)

| Variable               | Baseline    |            | 2 months    |            | 4 months    |            | Time <sup>a</sup> | Time * group <sup>b</sup> |
|------------------------|-------------|------------|-------------|------------|-------------|------------|-------------------|---------------------------|
|                        | Non engaged | Engaged    | Non engaged | Engaged    | Non engaged | Engaged    | p value           | p value                   |
| Q1: Use olive oil      | .46 ± .52   | .50 ± .51  | .62 ± .50   | .42 ± .50  | .46 ± .52   | 0.62 ± .50 | 0.868             | 0.15                      |
| Q2: How much olive oil | .38 ± .51   | .23 ± .43  | .31 ± .48   | .12 ± .33  | .38 ± .51   | .23 ± .43  | 0.535             | 0.975                     |
| Q3: Yes vegetable      | .31 ± .48   | .46 ± .51  | .69 ± .48   | .65 ± .49  | .38 ± .51   | .65 ± .49  | 0.019             | 0.188                     |
| Q4: Yes fruit          | .23 ± .44   | .15 ± .37  | .54 ± .52   | .46 ± .51  | .38 ± .50   | .38 ± .50  | 0.005             | 0.92                      |
| Q5: No red meat        | .77 ± .44   | .85 ± .37  | .77 ± .44   | .88 ± .33  | .85 ± .38   | .85 ± .37  | 0.919             | 0.806                     |
| Q6: No butter          | .69 ± .48   | .81 ± .40  | .77 ± .44   | .92 ± .27  | .77 ± .44   | .92 ± .27  | 0.418             | 0.965                     |
| Q7: No sweet beverages | .85 ± .38   | .88 ± .33  | .92 ± .28   | .92 ± .27  | .69 ± .48   | .92 ± .27  | 0.279             | 0.248                     |
| Q8: Yes legumes        | .31 ± .48   | .27 ± .45  | .46 ± .52   | .42 ± .50  | .54 ± .52   | .42 ± .50  | 0.087             | 0.912                     |
| Q9: Yes fish           | .15 ± .38   | .04 ± .2   | .23 ± .44   | .08 ± .27  | .31 ± .48   | .19 ± .40  | 0.146             | 0.905                     |
| Q10: Reduced sweets    | .69 ± .48   | .19 ± .40  | .31 ± .48   | .38 ± .50  | .31 ± .48   | .58 ± .50  | 0.616             | 0.001                     |
| Q11: Yes nuts          | .38 ± .51   | .50 ± .51  | .54 ± .52   | .58 ± .50  | .62 ± .51   | .65 ± .49  | 0.2               | 0.919                     |
| Q12: Yes white meat    | 0.69 ± .48  | 0.81 ± .4  | .92 ± .28   | .88 ± .33  | .85 ± .38   | 0.85 ± .37 | 0.15              | 0.567                     |
| Q13: Yes tomato sauce  | 0.54 ± .52  | .65 ± .49  | .54 ± .52   | .42 ± .50  | .46 ± .52   | .38 ± .50  | 0.101             | 0.344                     |
| TOTAL MDS              | 7.46 ± 2.2  | 7.35 ± 1.7 | 8.62 ± 1.6  | 8.15 ± 2.1 | 8.0 ± 2.7   | 8.65 ± 2.2 | 0.003             | 0.388                     |

<sup>a</sup> P-value tests for a significant within-group difference at all time points

<sup>b</sup> P-value tests for a significant between-group difference at all time points
